# Supplementary material for: Comparative Genomic Characterization of Buffalo Fibronectin Type III Domain Proteins: Exploring the Novel Role of FNDC5/Irisin as a Ligand of Gonadal Receptors
Source: MDPI journal article supplement (doi:10.3390/biology10111207), 2021-11-19
Supplement: s1 [file s1]

## Article

# Comparative Genomic Characterization of Buffalo Fibronectin Type III Domain Proteins: Exploring the Novel Role of FNDC5/Irisin as a Ligand of Gonadal Receptors

Siwen Wu <sup>1,†</sup>, Faiz-ul Hassan <sup>2,†</sup>, Yuhong Luo <sup>1</sup>, Israr Fatima <sup>3</sup>, Ishtiaq Ahmed <sup>4</sup>, Awais Ihsan <sup>5</sup>, Warda Safdar <sup>6</sup>, Qingyou Liu <sup>1,\*</sup> and Saif ur Rehman <sup>1,\*</sup>

<sup>1</sup> State Key Laboratory for Conservation and Utilization of Subtropical Agro-Bioresources, Guangxi University, Nanning 530005, China; siwenwu123@163.com (S.W.); luoyuhong0720@163.com (Y.L.)

<sup>2</sup> Institute of Animal and Dairy Sciences, University of Agriculture, Faisalabad 38040, Pakistan; f.hassan@uaf.edu.pk

<sup>3</sup> Department of Bioinformatics and Biotechnology, Govt. College University, Faisalabad 38000, Pakistan; fatimaisrar926@gmail.com

<sup>4</sup> School of Medical Science, Gold Coast Campus, Griffith University, Southport, QLD 4222, Australia; ishtiaq.ahmed@griffithuni.edu.au

<sup>5</sup> Department of Biosciences, COMSATS University Islamabad, Sahiwal Campus, Sahiwal 57000, Pakistan; awais@cuisahiwal.edu.pk

<sup>6</sup> Department of Biochemistry, Bahauddin Zakariya University, Multan 60000, Pakistan; wardakhanw9@gmail.com

\* Correspondence: qyliu-gene@gxu.edu.cn (Q.L.); Saif\_ali28@yahoo.com (S.u.R.)

† These authors contributed equally.

**Citation:** Wu, S.; Hassan, Fu.; Luo, Y.; Fatima, I.; Ahmed, I.; Ihsan, A.; Safdar, W.; Liu, Q.; Rehman, S.u.

Comparative Genomic Characterization of Buffalo Fibronectin Type III Domain Proteins: Exploring the Novel Role of FNDC5/Irisin as a Ligand of Gonadal Receptors. *Biology* **2021**, *10*, 1207. <https://doi.org/10.3390/biology10111207>

Academic Editor: Hiroetsu Suzuki

Received: 9 September 2021

Accepted: 16 November 2021

Published: 19 November 2021

**Publisher's Note:** MDPI stays neutral with regard to jurisdictional claims in published maps and institutional affiliations.

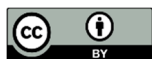

**Copyright:** © 2021 by the authors. Licensee MDPI, Basel, Switzerland. This article is an open access article distributed under the terms and conditions of the Creative Commons Attribution (CC BY) license (<http://creativecommons.org/licenses/by/4.0/>).

**Table S1.** The accession number of FN-III protein sequences used in this study.

| Gene                                                                     | Human          | Cattle         | Buffalo        |
|--------------------------------------------------------------------------|----------------|----------------|----------------|
| Fibronectin 1 (FN1)                                                      | XP_005246465.1 | XP_005202842.1 | XP_025134000.1 |
| Fibronectin type III domain containing 5 (FNDC5)                         | NP_001165411.2 | NP_001098891.1 | XP_025134275.1 |
| Fibronectin type III domain containing 3B (FNDC3B)                       | NP_001128567.1 | XP_005201753.1 | XP_025140051.1 |
| Fibronectin type III and ankyrin repeat domains 1 (FANK1)                | NP_001337868.1 | XP_024841256.1 | XP_025129687.1 |
| Fibronectin type III and SPRY domain containing 1 like (FSD1L)           | NP_001138785.1 | XP_024851352.1 | XP_006061602.1 |
| Leucine-rich repeat and fibronectin type III domain containing 1 (LRFN1) | NP_065913.1    | XP_024834841.1 | XP_006068730.1 |
| Leucine rich repeat and fibronectin type III domain containing 5 (LRFN5) | NP_001317035.1 | XP_005222160.1 | XP_025127666.1 |
| Fibronectin type III and SPRY domain containing 1 (FSD1)                 | NP_001317358.1 | NP_001074987.1 | XP_006042571.1 |
| Fibronectin type III domain containing 3A (FNDC3A)                       | NP_001073141.1 | XP_010808981.1 | XP_025119024.1 |
| Fibronectin type III domain containing 1 (FNDC1)                         | NP_115921.2    | XP_024852897.1 | XP_006051319.2 |
| Leucine rich repeat and fibronectin type III domain containing 3 (LRFN3) | NP_078785.1    | NP_001070427.1 | XP_025125629.1 |
| Fibronectin type III and SPRY domain containing 2 (FSD2)                 | NP_001007123.1 | NP_001192937.1 | XP_025127513.1 |
| Fibronectin type III domain containing 7 (FNDC7)                         | NP_001138409.1 | XP_024845811.1 | XP_006052208.2 |
| Ankyrin repeat and fibronectin type III domain containing 1 (ANKFN1)     | NP_001352687.1 | XP_027373748.1 | XP_006076307.1 |
| Immunoglobulin like and fibronectin type III domain containing 1 (IGFN1) | NP_001158058.1 | XP_024832341.1 | XP_025141009.1 |
| Fibronectin type III domain containing 4 (FNDC4)                         | XP_038969018.1 | NP_001095794.1 | XP_006046222.1 |
| Fibronectin type III domain containing 8 (FNDC8)                         | NP_060029.1    | NP_001069912.1 | XP_025136871.1 |
| Leucine-rich repeat and fibronectin type III domain containing 4 (LRFN4) | NP_001350453.1 | NP_001193183.1 | XP_025142533.1 |
| Fibronectin type III domain containing protein 3C1-like (LOC102393884)   | XP_038956079.1 | XP_019811022.1 | XP_025131684.1 |
| Fibronectin leucine rich transmembrane protein 2 (FLRT2)                 | NP_001333072.1 | XP_003586651.1 | XP_006069515.1 |

|                                                                                        |                |                |                |
|----------------------------------------------------------------------------------------|----------------|----------------|----------------|
| EGF like, fibronectin type III and laminin G domains (EGFLAM)                          | NP_001192230.1 | NP_001076947.1 | XP_025126375.1 |
| Fibronectin type III domain containing 9 (FNDC9)                                       | NP_001001343.2 | XP_005209734.1 | XP_006075933.1 |
| Leucine-rich repeat and fibronectin type III domain containing 2 (LRFN2)               | NP_065788.1    | NP_001179524.1 | XP_025126259.1 |
| Fibronectin leucine rich transmembrane protein 3 (FLRT3)                               | NP_037413.1    | NP_001179603.1 | XP_006051375.1 |
| Fibronectin leucine rich transmembrane protein 1 (FLRT1)                               | NP_001371395.1 | XP_005227270.1 | XP_006050918.2 |
| Fibronectin type III domain containing 11 (FNDC11)                                     | NP_001306081.1 | XP_024856577.1 | XP_025119638.1 |
| Fibronectin type III domain containing 10 (FNDC10)                                     | NP_001229588.1 | XP_024832575.1 | XP_025141526.1 |
| Extracellular leucine-rich repeat and fibronectin type III domain containing 2 (ELFN2) | NP_443138.2    | XP_005206935.1 | XP_025139285.1 |
| Extracellular leucine-rich repeat and fibronectin type III domain containing 1 (ELFN1) | NP_001122108.1 | XP_005225286.2 | XP_025130646.1 |

**Table S2.** Secondary structure and disorder prediction of FNDC5 protein.

|                          | Disordered | Alpha helix | Beta strand | TM helix |
|--------------------------|------------|-------------|-------------|----------|
| Homo sapiens             | 35%        | 08%         | 42%         | 10%      |
| Mediterranean buffalo    | 46%        | 11%         | 39%         | 10%      |
| Murrah buffalo           | 44%        | 0%          | 48          | 08%      |
| Swamp buffalo            | 48%        | 07%         | 40%         | 09%      |
| Bos taurus               | 39%        | 0%          | 50%         | -        |
| Bos indicus              | 40%        | 26%         | 21%         | 18%      |
| Bos taurus X Bos indicus | 40%        | 26%         | 21%         | 18%      |

[TM: transmembrane helix].
